# Supplementary material
Source: MDPI journal article supplement (https://www.mdpi.com/2072-4292/16/5/863)
Supplement: s1 [file s1]

## Supplementary Material

**Table S1.** Basic statistics on RMSE (ton ha<sup>-1</sup>) of the selected papers' models, where DM means Data Mining.

| Model Type  | Model      | Number of Papers | RMSE minimum (ton/ha) | RMSE average (ton/ha) | RMSE maximum (ton/ha) |
|-------------|------------|------------------|-----------------------|-----------------------|-----------------------|
| Mechanistic | AQUACROP   | 3                | 0.4                   | 1                     | 1.7                   |
|             | APSIM      | 6                | 3.4                   | 18                    | 32.4                  |
|             | DSSAT      | 5                | 5.2                   | 13                    | 24.6                  |
|             | FAO-AZM    | 6                | 13.8                  | 25                    | 46.1                  |
|             | WOFOST     | 2                | 6.7                   | 9                     | 12.7                  |
| Hybrid      | DM/FAO-AZM | 1                | 19.7                  | 20                    | 20                    |
| Empirical   | DM         | 14               | 0.2                   | 12                    | 32.1                  |

**Table S2.** Attributes based on field information.

| Acronym      | Description              | Reference  |
|--------------|--------------------------|------------|
| AGB          | Above Ground Biomass     | [23]       |
| AGE          | Crop Cycle               | [30,31]    |
| HARV_DATE    | Harvest date             | [12,31,32] |
| Irrig_status | Irrigation Status        | [31]       |
| TF-Ca        | Calcium in leaf tissue   | [24]       |
| TF-K         | Potassium in leaf tissue | [24]       |

|           |                                                                                                   |            |
|-----------|---------------------------------------------------------------------------------------------------|------------|
| TF-N      | Nitrogen in leaf tissue                                                                           | [24]       |
| N_HARV    | Number of harvests                                                                                | [12,30–32] |
| PE        | Sugarcane production environment,<br>according to [111]                                           | [12]       |
| SOIL_COD  | Soil code, generated from the combination<br>of suborder and soil group                           | [12]       |
| SOIL_GR   | Soil group: soil classification based on the<br>chemical attributes of the subsurface<br>horizon. | [12]       |
| SOIL_ORD  | Soil order: classification of the soil based on<br>the clay content in the A and B horizons.      | [12]       |
| SOIL_SORD | Soil suborder: soil classification based on<br>soil properties and horizons.                      | [12]       |
| SURFC     | Area of interest                                                                                  | [31]       |
| VAR       | Sugarcane Variety                                                                                 | [12,30–32] |
| ENA       | Percentage of internodes attacked by<br>caterpillars                                              | [31]       |
| SUC       | Sugar Content                                                                                     | [31]       |

**Table S3.** Attributes based on spectral bands and vegetation indices.

| Acronym | Description                                     | Reference |
|---------|-------------------------------------------------|-----------|
| APAR    | Absorbed photosynthetically active<br>radiation | [29]      |

|                     |                                                      |                        |
|---------------------|------------------------------------------------------|------------------------|
| ARVI                | Atmospherically Resistant Vegetation Index           | [27]                   |
| BI                  | Bare Soil Index                                      | [30]                   |
| BLUE                | Spectral Band in Blue                                | [22,27]                |
| CI                  | Chlorophyll Index Green                              | [30]                   |
| CIRE                | Chlorophyll Index Red Edge                           | [4]                    |
| COASTAL/<br>AEROSOL | Spectral Band in Coastal/Aerosol                     | [27]                   |
| CWSI                | Crop Water Stress Index                              | [29]                   |
| DVI                 | Difference Vegetation Index                          | [27]                   |
| EVI                 | Enhanced Vegetation Index                            | [11,12,26,27,30,31,80] |
| FPAR                | Fraction of Photosynthetically Active Radiation      | [26]                   |
| GCI                 | Green Chlorophyll Index                              | [27]                   |
| GNDVI               | Green Normalized Difference Vegetation Index         | [11,22,27,77]          |
| GPP                 | Gross Primary Productivity                           | [26]                   |
| GREEN               | Spectral Band in Green                               | [27]                   |
| GRVI                | Green-Red Vegetation Index                           | [112]                  |
| LAI                 | Leaf Area Index                                      | [25,26]                |
| MCARI               | Modified Chlorophyll Absorption in Reflectance Index | [80]                   |

|        |                                              |                        |
|--------|----------------------------------------------|------------------------|
| MSAVI  | Modified Soil Adjusted Vegetation Index      | [11]                   |
| MTVI   | Modified Triangular Vegetation Index         | [80]                   |
| NDBI   | Normalized Difference Built-up Index         | [30]                   |
| NDMI   | Normalized Difference Moisture Index         | [12,27,30]             |
| NDRE   | Normalized Difference Red-Edge Index [113]   | [22,80]                |
| NDRE1  | Normalized Difference Red-Edge 1 Index [114] | [4]                    |
| NDSIs  | Normalized Difference Spectral Indices       | [32]                   |
| NDVI   | Normalized Difference Vegetation Index       | [4,11,12,22–31,80,115] |
| NDWI 1 | Normalized Difference Water Index [79]       | [12,27]                |
| NDWI 2 | Normalized Difference Water Index [116]      | [12]                   |
| NG     | Normalized Green                             | [27]                   |
| NIR    | Spectral Band in the Near-Infrared           | [12,22,27]             |
| NN     | Normalized Near Infrared                     | [27]                   |
| NR     | Normalized Red                               | [27]                   |
| OSAVI  | Optimized Soil Adjusted Vegetation Index     | [27]                   |

|               |                                            |            |
|---------------|--------------------------------------------|------------|
| RED           | Spectral Band in Red                       | [12,22,27] |
| RED_EDGE<br>1 | Spectral Band in RedEdge 1                 | [12,22,27] |
| RVI           | Ratio Vegetation Index                     | [27]       |
| SAVI          | Soil Adjusted Vegetation Index             | [11,12,27] |
| SIRI          | Short Wave Infrared Ratio                  | [11]       |
| SR            | Simple Ratio                               | [11]       |
| SWIR1         | Spectral Band in Short-wave Infrared 1     | [12,27]    |
| SWIR2         | Spectral Band in Short-wave Infrared 2     | [12,27]    |
| Ts            | Canopy Surface Temperature                 | [29]       |
| VARI          | Visible Atmospherically Resistant<br>Index | [27]       |
| VCI           | Vegetation Condition Index                 | [83,115]   |
| VOD           | Vegetation Optical Depth                   | [112]      |
| WDRVI         | Wide Dynamic Range Vegetation<br>Index     | [22]       |
| WS            | Water Scalar                               | [23,80]    |

**Table S4.** Attributes based on meteorological data.

| Acronym | Description      | Reference     |
|---------|------------------|---------------|
| PPT     | Precipitation    | [12,26,30–32] |
| Rg      | Global Radiation | [12,30–32]    |

|        |                                     |                |
|--------|-------------------------------------|----------------|
| Tmax   | Maximum temperature                 | [12,31,32,115] |
| Tmin   | Minimum temperature                 | [12,31,32,115] |
| ET     | Evapotranspiration                  | [26,30]        |
| EP     | Evaporation                         | [30,32]        |
| ETP    | Potential<br>Evapotranspiration     | [26,31]        |
| RH     | Relative Humidity                   | [12,31,115]    |
| SPI    | Standardized Precipitation<br>Index | [12,26]        |
| LE     | Latent Heat Flux                    | [26]           |
| CD     | Presence of Cold day                | [30]           |
| CW     | Presence of cold waves              | [30]           |
| DS     | Presence of a dry season            | [30]           |
| ER     | Effective rainfall on the day       | [30]           |
| HW     | Heat waves on the day               | [30]           |
| HR     | Heavy rainfall on the day           | [30]           |
| LR     | Long rains on the day               | [30]           |
| VP     | Vapour pressure                     | [32]           |
| Trange | Temperature range                   | [31]           |
| WS     | Wind speed                          | [12]           |
| GDD    | Degree day                          | [30,31]        |

**Table S5.** Attributes based on SAR data.

| Acronym | Description                                              | Reference |
|---------|----------------------------------------------------------|-----------|
| VH      | Polarization from the C-band of the Sentinel-1 satellite | [32,80]   |
| VV      | Polarization from the C-band of the Sentinel-1 satellite | [32,80]   |
| VV/VH   | Ratio between VV and VH polarizations                    | [32,80]   |

**Table S6.** Attributes based on terrain information.

| Acronym | Description                      | Reference |
|---------|----------------------------------|-----------|
| DEM     | Digital Elevation Model          | [30,32]   |
| Slope   | Slope                            | [30,32]   |
| MrRTF   | Muti-res Ridge Top Flatness      | [30]      |
| ASP     | Aspect                           | [32]      |
| CURV    | Curvature                        | [32]      |
| MrVBF   | Multi-res Valley Bottom Flatness | [30]      |
| TWI     | Total Wetness Index              | [30]      |

**Table S7.** Other attribute types.

| Acronym  | Description                  | Reference |
|----------|------------------------------|-----------|
| RAD_DOSE | Radiation Adsorbed Dose      | [30]      |
| RAD_K    | Gamma Radiometrics Potassium | [30]      |

|          |                            |      |
|----------|----------------------------|------|
| RAD_Th   | Gamma Radiometrics Thorium | [30] |
| RAD_TK   | Th:K                       | [30] |
| RAD_U    | Gamma Radiometrics Uranium | [30] |
| RAD_U2Th | U2:Th ratio                | [30] |
| RAD_UK   | U:K ratio                  | [30] |
| RAD_UTH  | U:Th ratio                 | [30] |
